# Supplementary material
Source: HighWire-hosted journal article supplement (https://hw-f5-jim.highwire.org/content/69/7/1350)
Supplement: inline-supplementary-material-1 [file inline-supplementary-material-1.pdf]

## Supplementary Material

### Importance of Beta-Lactam Pharmacokinetics and Pharmacodynamics on the Recovery of Microbial Diversity in the Airway of Persons with Cystic Fibrosis

Andrea Hahn MD, MS, Aszia Burrell BS, Hollis Chaney MD, Iman Sami MD, Anastassios C. Koumbourlis MD, MPH, Robert J. Freishtat MD, MPH, Edith T. Zemanick MD, Stan Louie PhD, and Keith A. Crandall PhD

**Supplemental Table 1. Breakdown of Sample Type by Time Point and Time Above the Minimum Inhibitory Concentration**

|                                    | <i>f</i> T>MIC sufficient (n=14)* | <i>f</i> T>MIC not sufficient (n=13) |
|------------------------------------|-----------------------------------|--------------------------------------|
| Exacerbation: Ratio OP swab:sputum | 12:2                              | 6:6                                  |
| Treatment: Ratio OP swab:sputum    | 7:3                               | 9:2                                  |
| Follow up: Ratio OP swab:sputum    | 11:1                              | 6:6                                  |

OP, oropharyngeal

\*Missing data as only samples collected that were successfully sequenced are included in the total counts.

**Supplemental Table 2. Richness and Alpha Diversity by Time Point**

|                                                            | <i>f</i> T>MIC sufficient (n=14) | <i>f</i> T>MIC not sufficient (n=13) | P value |
|------------------------------------------------------------|----------------------------------|--------------------------------------|---------|
| OTUs observed: Exacerbation (predicted mean, SE)*          | 39.0 (5.8)                       | 37.4 (6.3)                           | 0.860   |
| OTUs observed: Treatment (predicted mean, SE)*             | 26.4 (3.2)                       | 22.5 (3.1)                           | 0.388   |
| OTUs observed: Follow up (predicted mean, SE)*             | 37.6 (6.5)                       | 48.8 (6.5)                           | 0.250   |
| Inverse Simpson Index: Exacerbation (predicted mean, SE)** | 5.04 (0.78)                      | 3.50 (0.85)                          | 0.201   |
| Inverse Simpson Index: Treatment (predicted mean, SE)*     | 2.91 (0.30)                      | 2.80 (0.28)                          | 0.791   |
| Inverse Simpson Index: Follow up (predicted mean, SE)**    | 3.58 (0.77)                      | 4.97 (0.77)                          | 0.226   |
| Shannon Diversity: Exacerbation (predicted mean, SE)*      | 1.82 (0.21)                      | 1.49 (0.22)                          | 0.303   |
| Shannon Diversity: Treatment (predicted mean, SE)*         | 1.41 (0.15)                      | 1.38 (0.14)                          | 0.873   |
| Shannon Diversity: Follow up (predicted mean, SE)*         | 1.68 (0.20)                      | 1.93 (0.20)                          | 0.405   |

SE, standard error

\*General linear model with Gaussian family and identity link, controlling for sample type (sputum vs oropharyngeal swab)

#Log transform

**Supplemental Table 3. Changes in Richness, Alpha Diversity, and Beta Diversity Across Time Points**

|                                                                           | <i>f</i> T>MIC sufficient<br>(n=14) | <i>f</i> T>MIC not sufficient<br>(n=13) | P<br>value |
|---------------------------------------------------------------------------|-------------------------------------|-----------------------------------------|------------|
| OTUs observed: Exacerbation to Treatment<br>(predicted mean, SE)*         | -9.37 (6.5)                         | -13.8 (6.2)                             | 0.625      |
| OTUs observed: Exacerbation to Follow up<br>(predicted mean, SE)*         | -5.8 (7.1)                          | +11.2 (7.1)                             | 0.110      |
| Shannon Diversity: Exacerbation to Treatment<br>(predicted mean, SE)*†    | -0.217 (0.245)                      | -0.146 (0.233)                          | 0.836      |
| Shannon Diversity: Exacerbation to Follow up<br>(predicted mean, SE)*     | -0.222 (0.208)                      | +0.452 (0.208)                          | 0.031      |
| Inverse Simpson Index: Exacerbation to<br>Treatment (predicted mean, SE)* | -1.200 (0.719)                      | -0.800 (0.684)                          | 0.691      |
| Inverse Simpson Index: Exacerbation to Follow up<br>(predicted mean, SE)* | -1.376 (0.858)                      | +1.388 (0.858)                          | 0.032      |
| Morisita-Horn: Exacerbation to Treatment<br>(predicted mean, SE)*†        | 0.477 (0.125)                       | 0.534 (0.119)                           | 0.744      |
| Morisita-Horn: Exacerbation to Follow up<br>(predicted mean, SE)*         | 0.528 (0.098)                       | 0.471 (0.098)                           | 0.697      |

SE, standard error

\*General linear model with Gaussian family and identity link, controlling for discordance of sample types collected between time points

†Non-normal distribution

**Supplemental Table 4. Recovery of Lung Function Following Antibiotic Treatment**

|                                                                | fT>MIC sufficient | fT>MIC not sufficient | P value |
|----------------------------------------------------------------|-------------------|-----------------------|---------|
| <b>Pulmonary Function at End of Treatment (mean, SE)*</b>      | <b>(n=12)</b>     | <b>(n=12)</b>         |         |
| % predicted FEV1                                               | 80.5 (6.2)        | 101.6 (6.2)           | 0.055   |
| % predicted FVC                                                | 83.9 (5.3)        | 107.1 (5.3)           | 0.014   |
| % predicted FEF25-75                                           | 69.2 (14.5)       | 111.0 (14.5)          | 0.103   |
| Normalized FEV1 <sup>#</sup>                                   | 92.6 (2.60)       | 99.9 (3.05)           | 0.803   |
| Normalized FVC <sup>†</sup>                                    | 91.6 (2.16)       | 104.1 (5.49)          | 0.634   |
| Normalized FEF25-75                                            | 92.5 (4.77)       | 100.2 (5.29)          | 0.830   |
| <b>Pulmonary Function at Follow up<sup>‡</sup> (mean, SE)*</b> | <b>(n=11)</b>     | <b>(n=10)</b>         |         |
| % predicted FEV1 <sup>^</sup>                                  | 88.8 (4.4)        | 97.7 (4.7)            | 0.218   |
| % predicted FVC                                                | 91.6 (5.2)        | 102.3 (5.6)           | 0.262   |
| % predicted FEF25-75                                           | 80.3 (10.9)       | 98.0 (11.7)           | 0.371   |
| Normalized FEV1                                                | 94.2 (2.64)       | 96.7 (4.77)           | 0.887   |
| Normalized FVC                                                 | 94.5 (2.81)       | 99.0 (3.60)           | 0.829   |
| Normalized FEF25-75                                            | 90.5 (3.62)       | 90.1 (6.25)           | 0.446   |

SE, standard error; FEV1, forced expiratory volume in one second; FVC, forced vital capacity; FEF25-75, forced expiratory flow 25-75

Normalized = percent recovery compared to baseline value (e.g., end of treatment FEV1/baseline FEV1)

\*General linear model with Gaussian family and identity link, controlling for demographic characteristics

<sup>#</sup>Cubic transform

<sup>†</sup>Inverse transform

<sup>‡</sup>Missing data exists because PFTs had to be obtained prior to another antibiotic treatment course

<sup>^</sup>Square transform

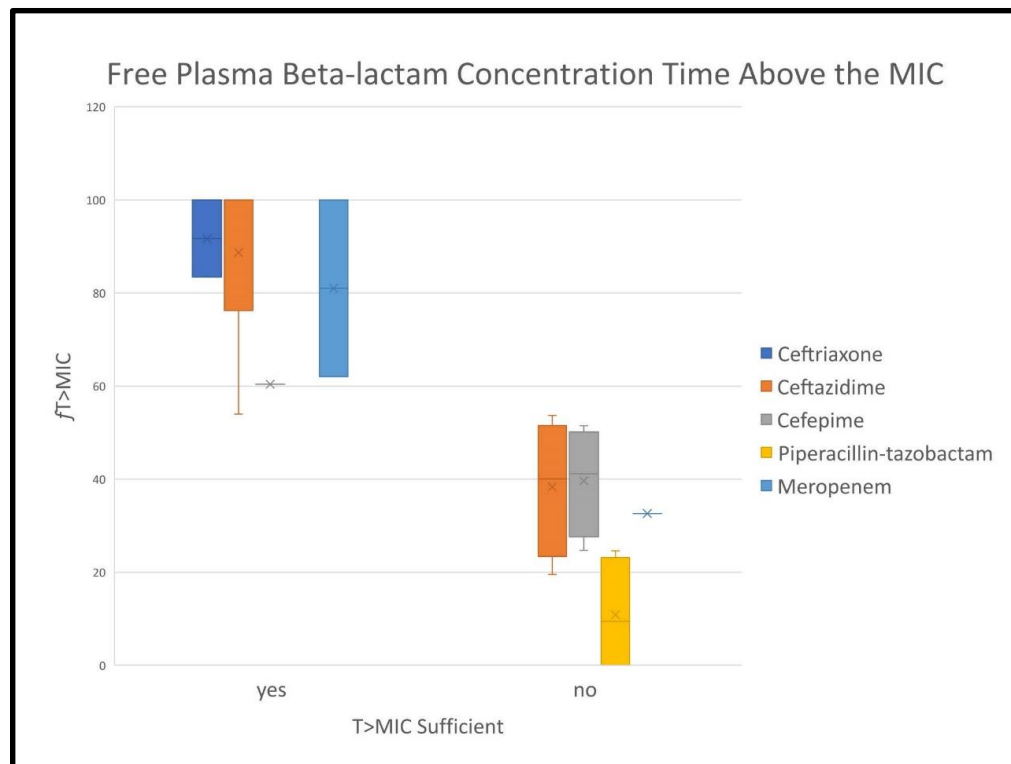

**Supplemental Figure 1. Box and Whiskers Plot of Free Plasma Concentration Time above the MIC.**

$fT>MIC$ , time above the minimum inhibitory concentration; no,  $fT>MIC$  not sufficient; yes,  $fT>MIC$  sufficient. "x" corresponds to mean values. Center horizontal line corresponds to median. Colored boxes represent the interquartile ranges. Twenty-seven values are included in this plot; for the five study participants who received two beta-lactam antibiotics, the highest  $fT>MIC$  is reported.

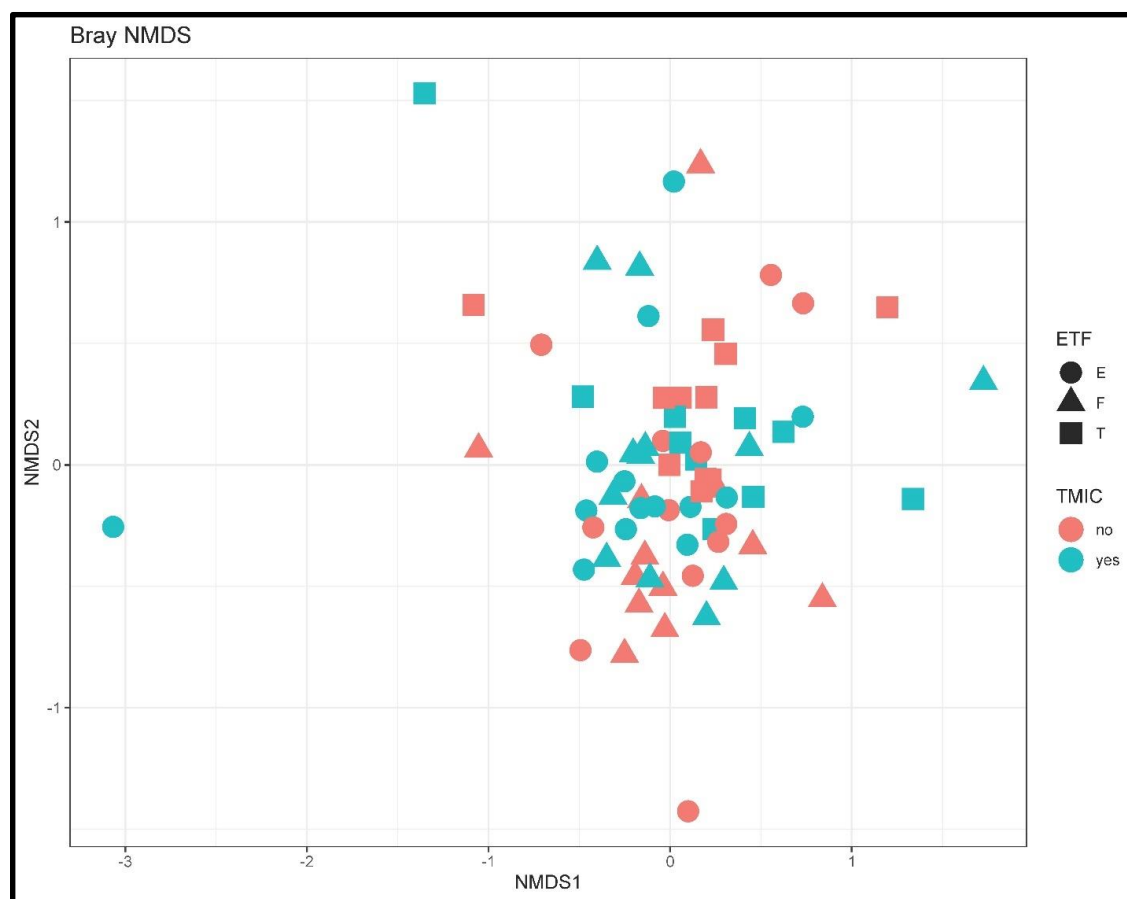

**Supplemental Figure 2. Bray-Curtis non-metric multi-dimensional scaling plot of respiratory samples.** PERMANOVA  $R^2$  0.016,  $p > 0.999$  for  $fT > MIC$ , controlling for repeated samples from the same study participant using the STRATA function.  $fT > MIC$ , time above the minimum inhibitory concentration; E, exacerbation; T, treatment; F, follow up; no,  $fT > MIC$  not sufficient; yes,  $fT > MIC$  sufficient.

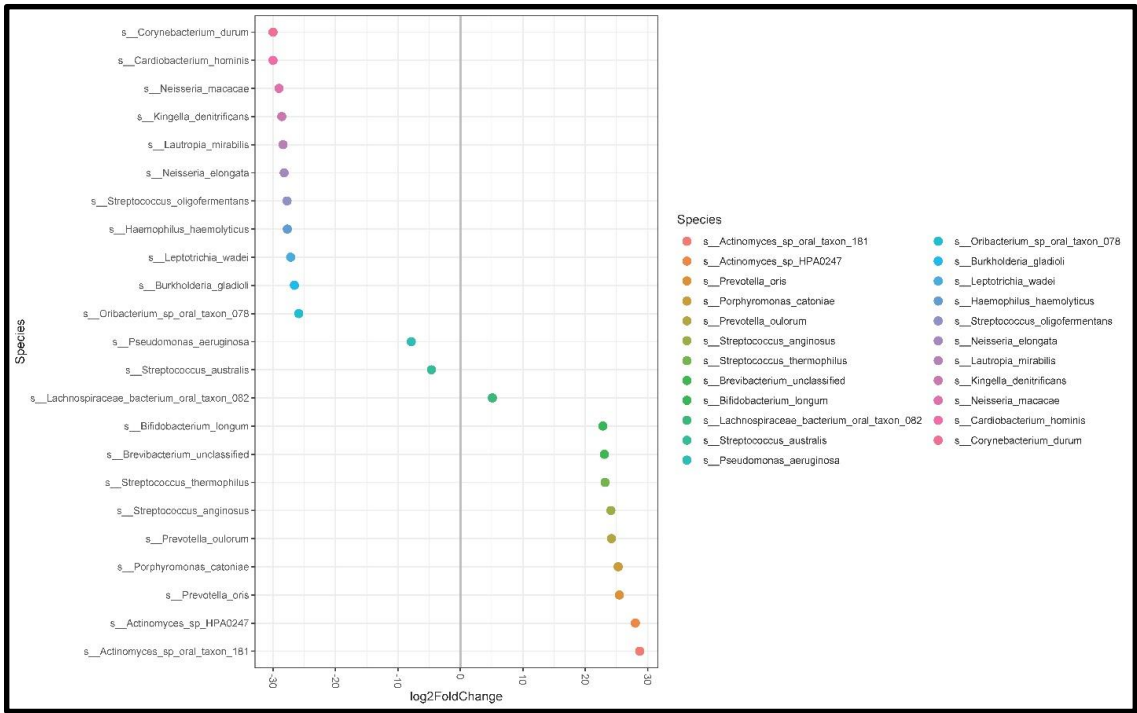

**Supplemental Figure 3. Differential abundance of bacterial taxa.** All time points are included. Negative log2 fold change are more abundant in  $fT > MIC$  not sufficient; positive log2 fold change are more abundant in  $fT > MIC$  sufficient. All bacterial taxa shown had a p value  $< 0.05$ .

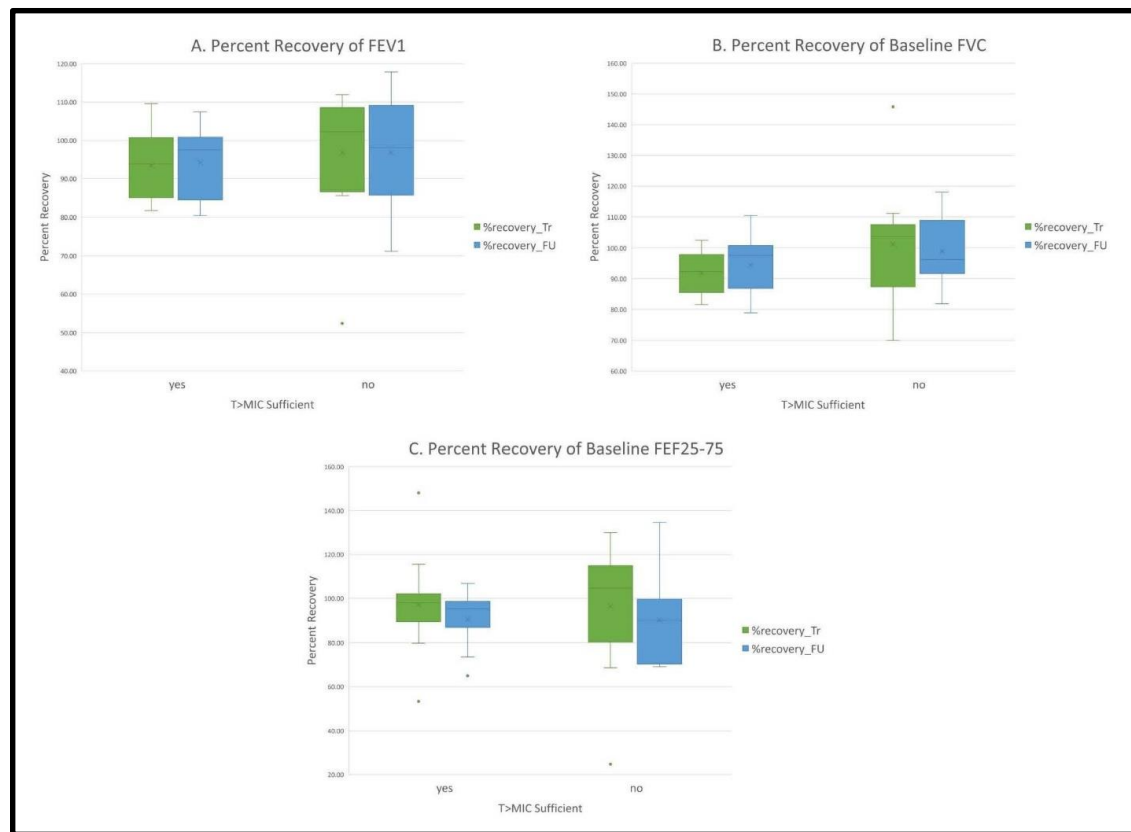

**Supplemental Figure 4. Box and Whiskers Plot of Normalized Recovery of Lung Function Compared to Baseline Following Antibiotic Treatment.** Panel A. Percent Recovery of FEV1. Panel B. Percent Recovery of Baseline FVC. Panel C. Percent Recovery of Baseline FEF25-75. FEV1, forced expiratory volume in one second; FVC, forced vital capacity; FEF25-75, forced expiratory flow 25-75; Tr, Treatment; FU, Follow up;  $fT > MIC$ , time above the minimum inhibitory concentration; no,  $fT > MIC$  not sufficient; yes,  $fT > MIC$  sufficient. Normalized = percent recovery compared to baseline value (e.g., end of treatment FEV1/baseline FEV1). “x” corresponds to mean values. Center horizontal line corresponds to median. Colored boxes represent the interquartile ranges. Small circles represent individual values.
